# Supplementary material for: Gastrointestinal Adenocarcinoma Incidence and Survival Trends in South Australia, 1990–2017
Source: MDPI journal article supplement (doi:10.3390/cancers14020275), 2022-01-06

## Supplementary data

**Table S1. Average annual percentage change, AAPC, (Poisson Regression Model) for gender and primary sites of cancer between two age groups (N=28,566).**

|                    | (18-50 years)    |         | (>50 years)      |         |
|--------------------|------------------|---------|------------------|---------|
|                    | N=2,129          |         | N=26,437         |         |
|                    | AAPC (95% CI)    | P Value | AAPC (95% CI)    | P Value |
| <b>Sex</b>         |                  |         |                  |         |
| Female             | 1.00 (0.99-1.01) | 0.62    | 1.00 (1.00-1.00) | 0.10    |
| Male               | 1.01 (1.00-1.02) | <0.01   | 1.00 (1.00-1.00) | 0.58    |
| <b>Cancer site</b> |                  |         |                  |         |
| Colon & Rectum     | 1.01 (1.01-1.02) | <0.001  | 0.99 (0.99-1.00) | <0.001  |
| Pancreas           | 1.02 (1.00-1.04) | 0.07    | 1.03 (1.02-1.04) | <0.001  |
| Stomach            | 1.04 (1.02-1.06) | <0.001  | 0.99 (0.99-1.00) | 0.02    |
| Oesophagus         | 1.01 (0.98-1.04) | 0.68    | 1.05 (1.04-1.05) | <0.001  |

**Table S2. Incidence rate ratios (IRR) and 95% CI (Poisson regression model) for sex and era by primary sites between two age groups (n=27,855).**

|                   | (18-50 years)      |         | (>50 years)      |         |
|-------------------|--------------------|---------|------------------|---------|
|                   | N=2,107            |         | N=25,748         |         |
|                   | IRR (95% CI)       | P-value | IRR (95% CI)     | P-value |
| Colon & Rectum    |                    |         |                  |         |
| <b>Sex</b>        |                    |         |                  |         |
| Female            | Reference          | -       | Reference        | -       |
| Male              | 1.14 (1.04-1.25)   | <0.01   | 1.44 (1.40-1.48) | <0.001  |
| <b>Era</b>        |                    |         |                  |         |
| 1990-1999         | Reference          | -       | Reference        | -       |
| 2000-2009         | 1.06 (0.95-1.19)   | 0.29    | 0.95 (0.92-0.98) | <0.01   |
| 2010-2017         | 1.31 (1.17-1.46)   | <0.001  | 0.89 (0.86-0.92) | <0.001  |
| Pancreas          |                    |         |                  |         |
| <b>Sex</b>        |                    |         |                  |         |
| Female            | Reference          | -       | Reference        | -       |
| Male              | 1.36 (0.99-1.88)   | 0.06    | 1.30 (1.20-1.42) | <0.001  |
| <b>Era</b>        |                    |         |                  |         |
| 1990-1999         | Reference          | -       | Reference        | -       |
| 2000-2009         | 1.55 (1.03 – 2.35) | 0.04    | 1.06 (0.94-1.19) | 0.33    |
| 2010-2017         | 1.83 (1.21-2.77)   | <0.01   | 1.74 (1.57-1.94) | <0.001  |
| Stomach/Intestine |                    |         |                  |         |
| <b>Sex</b>        |                    |         |                  |         |
| Female            | Reference          | -       | Reference        | -       |
| Male              | 2.15 (1.48-3.12)   | <0.001  | 2.54 (2.30-2.81) | <0.001  |
| <b>Era</b>        |                    |         |                  |         |
| 1990-1999         | Reference          | -       | Reference        | -       |
| 2000-2009         | 0.89 (0.54-1.45)   | 0.64    | 0.69 (0.61-0.77) | <0.001  |
| 2010-2017         | 2.24 (1.48-3.40)   | <0.001  | 0.85 (0.77-0.95) | <0.01   |
| Oesophagus        |                    |         |                  |         |
| <b>Sex</b>        |                    |         |                  |         |
| Female            | Reference          | -       | Reference        | -       |
| Male              | 5.26 (2.84-9.75)   | <0.001  | 6.00 (5.08-7.08) | <0.001  |
| <b>Era</b>        |                    |         |                  |         |
| 1990-1999         | Reference          | -       | Reference        | -       |
| 2000-2009         | 2.71 (1.44-5.13)   | <0.01   | 1.20 (1.01-1.43) | 0.04    |
| 2010-2017         | 2.60 (1.35-5.03)   | <0.01   | 2.15 (1.83-2.52) | <0.001  |

**Table S3. Hazard ratios (HR) and 95% CI (Cox Proportional hazard model) for sex and era by primary sites between two age groups (n=27,855).**

|                   | (18-50 years)    |         | (>50 years)      |         |
|-------------------|------------------|---------|------------------|---------|
|                   | N=2,107          |         | N=25,748         |         |
|                   | HR (95% CI)      | P-value | HR (95% CI)      | P-value |
| Colon & Rectum    |                  |         |                  |         |
| <b>Sex</b>        |                  |         |                  |         |
| Female            | Reference        | -       | Reference        | -       |
| Male              | 1.12 (0.97-1.30) | 0.12    | 1.11 (1.07-1.15) | <0.001  |
| <b>Era</b>        |                  |         |                  |         |
| 1990-1999         | Reference        | -       | Reference        | -       |
| 2000-2009         | 0.76 (0.64-0.90) | <0.01   | 0.83 (0.80-0.86) | <0.001  |
| 2010-2017         | 0.82 (0.68-0.99) | 0.04    | 0.75 (0.71-0.78) | <0.001  |
| Pancreas          |                  |         |                  |         |
| <b>Sex</b>        |                  |         |                  |         |
| Female            | Reference        | -       | Reference        | -       |
| Male              | 1.14 (0.82-1.58) | 0.45    | 0.94 (0.86-1.03) | 0.18    |
| <b>Era</b>        |                  |         |                  |         |
| 1990-1999         | Reference        | -       | Reference        | -       |
| 2000-2009         | 0.75 (0.49-1.14) | 0.18    | 0.72 (0.64-0.81) | <0.001  |
| 2010-2017         | 0.77 (0.51-1.18) | 0.24    | 0.69 (0.62-0.77) | <0.001  |
| Stomach/Intestine |                  |         |                  |         |
| <b>Sex</b>        |                  |         |                  |         |
| Female            | Reference        | -       | Reference        | -       |
| Male              | 1.74 (1.09-2.80) | 0.02    | 0.91 (0.82-1.01) | 0.09    |
| <b>Era</b>        |                  |         |                  |         |
| 1990-1999         | Reference        | -       | Reference        | -       |
| 2000-2009         | 1.16 (0.67-2.02) | 0.60    | 0.93 (0.82-1.05) | 0.22    |
| 2010-2017         | 0.81 (0.49-1.32) | 0.39    | 0.99 (0.88-1.12) | 0.92    |
| Oesophagus        |                  |         |                  |         |
| <b>Sex</b>        |                  |         |                  |         |
| Female            | Reference        | -       | Reference        | -       |
| Male              | 0.88 (0.44-1.75) | 0.72    | 0.82 (0.68-0.98) | 0.03    |
| <b>Era</b>        |                  |         |                  |         |
| 1990-1999         | Reference        | -       | Reference        | -       |
| 2000-2009         | 0.94 (0.46-1.92) | 0.88    | 0.85 (0.71-1.03) | 0.09    |
| 2010-2017         | 0.82 (0.38-1.74) | 0.60    | 0.83 (0.70-0.98) | 0.03    |

**Figure S1. Trend in incidence rates by sex and era between two age groups across cancer sites 1990-2017 (n=28,566).**

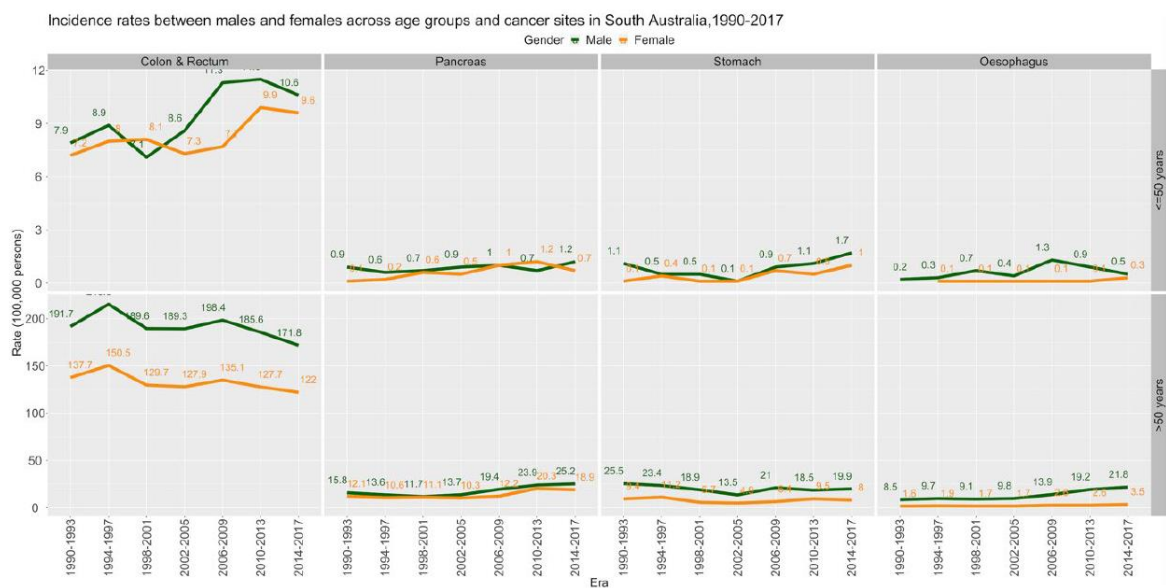

Figure S2. Kaplan-Meier survival curves for sex, era and primary sites between age groups

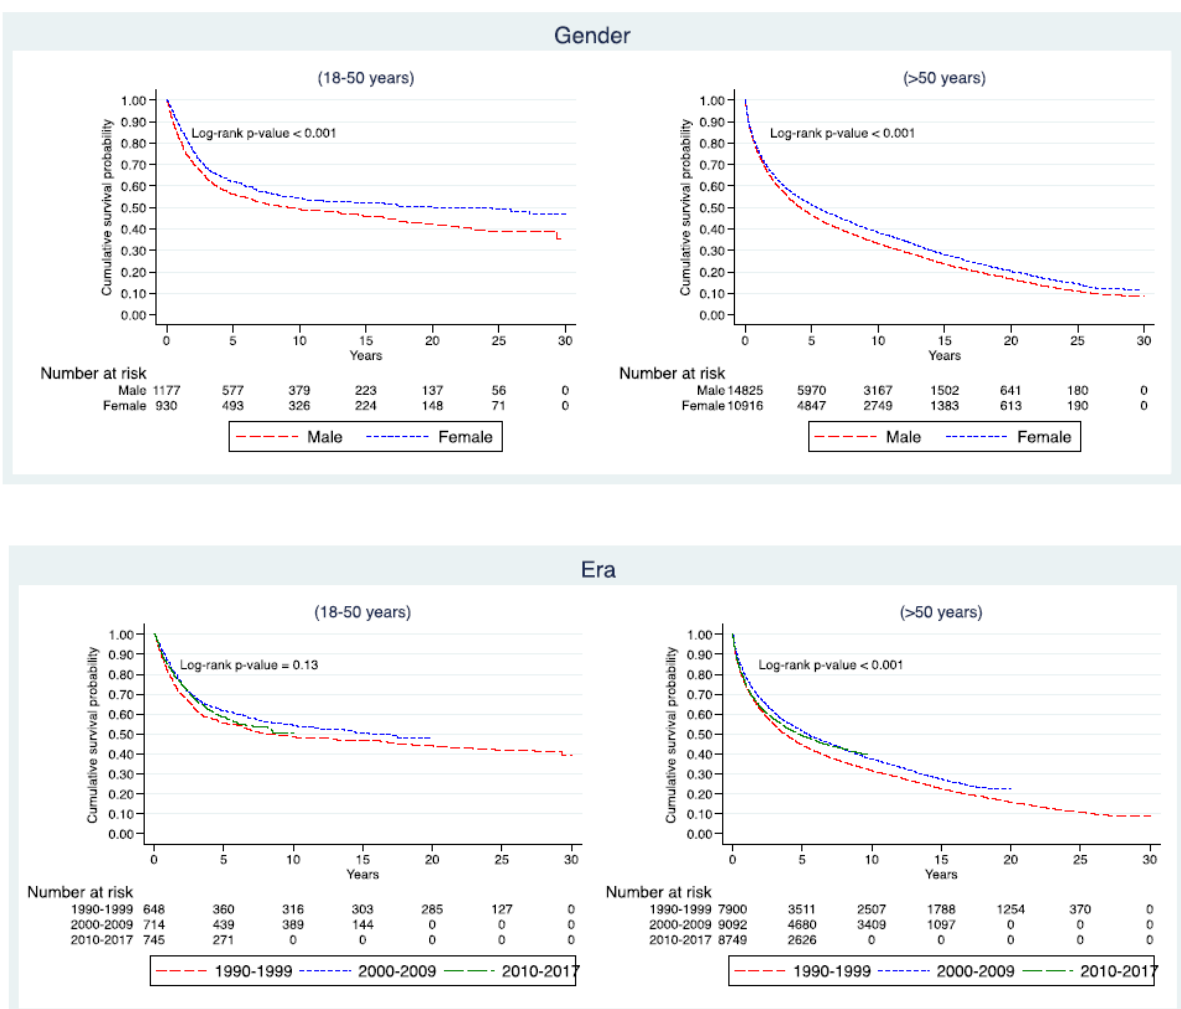

Primary sites

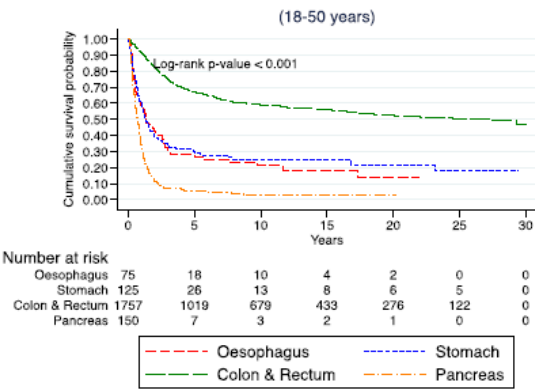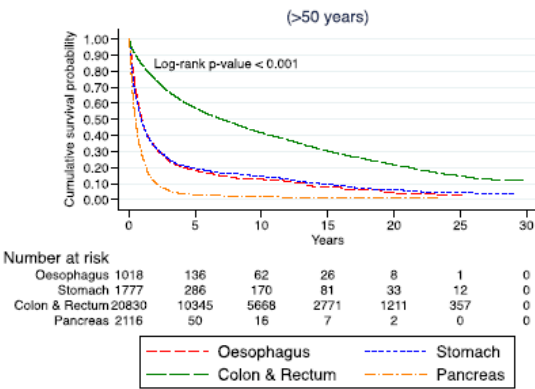

Supplement: s1 [file s1]
